# Supplementary material for: Palmitate reduces starvation-induced ER stress by inhibiting ER-phagy in hypothalamic cells
Source: PubMed Central journal article supplement (PMC8025501; doi:10.1186/s13041-021-00777-8), 2021-04-06

**Fig. S2**

**a**

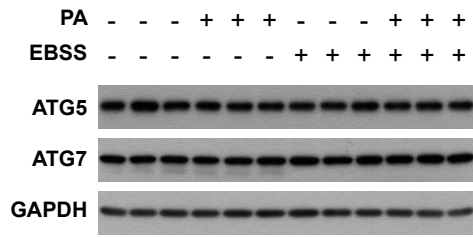

**b**

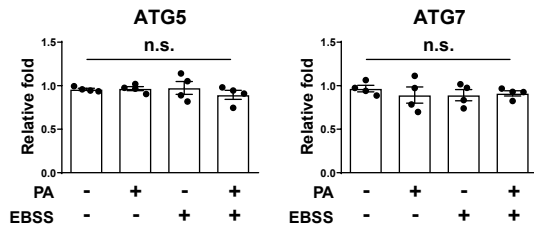

Supplement: 13041_2021_777_MOESM2_ESM.pdf [file 13041_2021_777_MOESM2_ESM.pdf]
